# Supplementary material for: Do chronic heart failure symptoms interact with burden of treatment? Qualitative literature systematic review
Source: PubMed Central journal article supplement — BMJ Open. 2021 Jul 30;11(7):e047060. doi: 10.1136/bmjopen-2020-047060 (PMC8327846; doi:10.1136/bmjopen-2020-047060), 2021-07-30
Supplement: bmjopen-2020-047060supp001.pdf [file bmjopen-2020-047060supp001.pdf]

## Literature Synthesis Search strategies

**MEDLINE (Ovid interface) Ovid MEDLINE (R) Epub Ahead of Print, In-Process & Other Non-Indexed Citations, Ovid MEDLINE (R) Daily and Ovid MEDLINE (R) 1946 to Present. Search run on 4/Nov/2017, re-run Jan 20, 2020**

1. Heart failure.af.
2. (Heart failure, diastolic or heart failure, systolic).af
3. ((heart\$ or cardiac or cardial or myocardial) adj3 decompensat\$).af.
4. ((heart\$ or cardiac or cardial or myocardial) adj3 failure\$).af.
5. ((heart\$ or cardiac or cardial or myocardial) adj3 incompetenc\$).af.
6. ((heart\$ or cardiac or cardial or myocardial) adj3 insufficienc\$).af.
7. ((heart\$ or cardiac or cardial or myocardial) adj3 (standstill or stand-still)).af.
8. (CHF or CHF\$ or HF).af.
9. 1 or 2 or 3 or 4 or 5 or 6 or 7 or 8
10. exp Qualitative Research/
11. qualitativ\$.ti,ab,kf.
12. Interviews as Topic/
13. interview\$.ti,ab,kf.
14. Focus Groups/
15. Grounded Theory/
16. (grounded theor\$ or grounded stud\$ or grounded research or grounded analys\$).ti,ab,kf.
17. focus group\$1.ti,ab,kf.
18. phenomenol\$.ti,ab,kf.
19. (ethnograph\$ or ethnours\$ or ethno-graph\$ or ethno-nurs\$).ti,ab,kf.
20. (story or stories or storytelling or narrative\$1).ti,ab,kf.
21. (open-ended or open question\$ or text\$).ti,ab,kf.
22. Narration/
23. Personal Narratives/
24. Personal Narratives as Topic/
25. (discourse\$ analys\$ or discours\$ analys\$).ti,ab,kf.
26. Content\$ analys\$.ti,ab,kf.
27. ethnological.ti,ab,kf.
28. purposive sampl\$.ti,ab,kf.
29. (constant comparative or constant comparison\$1).ti,ab,kf.
30. theoretical sampl\$.ti,ab,kf.
31. (theme\$ or thematic\$).ti,ab,kf.
32. (emic or etic or hermeneutic\$ or heuristic\$ or semiotic\$).ti,ab,kf.
33. data saturat\$.ti,ab,kf.
34. participant observ\$.ti,ab,kf.
35. exp Humanism/
36. (humanistic\$ or existential\$ or experiential\$ or paradigm\$).ti,ab,kf.
37. Postmodernism/
38. (social construct\$ or postmodern\$ or post-modern\$ or poststructural\$ or post-structural\$ or feminis\$ or constructivis\$).ti,ab,kf.
39. (action resesarch or cooperative inquir\$ or co-operative inquir\$ or coproduct& or co-producti\$).ti,ab,kf.
40. biographical method\$.ti,ab,kf.
41. human science.ti,ab,kf.
42. life world.ti,ab,kf.
43. theoretical saturat\$.ti,ab,kf.
44. mixed method\$.ti,ab,kf.
45. (observational method\$ or observational approach\$).ti,ab,kf.
46. key informant\$1.ti,ab,kf.
47. (field study or field studies or field research\$ or field work\$ or fieldwork\$).ti,ab,kf.
48. (semi-structured or semistructured or unstructured or un-structured or informal or in-depth or indepth).ti,ab,kf.
49. "face-to-face".ti,ab,kf.
50. ((guide or structure) adj5 (disscusion\$1 or questionnaire\$1)).ti,ab,kf.
51. (heidegger\$ or colaizzi\$ or speigelberg\$ or van manen\$ or van kaam\$ or merleau ponty\$ or husserl\$ or giorgi\$ or foucault\$ or corbin\$ or glasser\$).ti,ab,kf
52. 10 or 11 or 12 or 13 or 14 or 15 or 16 or 17 or 18 or 19 or 20 or 21 or 22 or 23 or 24 or 25 or 26 or 27 or 28 or 29 or 30 or 31 or 32 or 33 or 34 or 35 or 36 or 37 or 38 or 39 or 40 or 41 or 42 or 43 or 44 or 45 or 46 or 47 or 48 or 49 or 50 or 51
53. Consumer Behavior/
54. Attitude/
55. exp Attitude to Health/
56. Attitude to Death/
57. Personal Satisfaction/
58. exp Emotions/
59. Stress, Psychological/
60. exp Patients/px [Psychology]
61. Caregivers/px [Psychology]
62. Professional-Patient Relations/
63. Nurse-Patient Relations/
64. Physician-Patient Relations/

65. Professional-Family Relations/
66. Empathy/
67. Feedback/
68. ((patient\$1 or client\$1 or user\$1 or consumer\$1 or personal) and (experienc\$ or perspective\$1 or perception\$1 or opinion\$1 or account or accounts or attitude\$1 or view or views or viewpoint\$1 or satisf\$ or unsatisf\$ or dissatisf\$ or disatisf\$ or believ\$1 or believ\$)).ti.
69. ((patient\$1 or client\$1 or user\$1 or consumer\$1 or personal) adj3 (experienc\$ or perspective\$1 or perception\$1 or opinion\$1 or account or accounts or attitude\$1 or view or views or viewpoint\$1 or satisf\$ or unsatisf\$ or dissatisf\$ or disatisf\$ or believ\$1 or believ\$)).ab,kf.
70. ((patient\$1 or client\$1 or user\$1 or consumer\$1 or personal) and (emotion\$ or feeling\$1 or happy or happiness or unhappy or unhappiness or sad or sadness or anger or angry or anxiet\$ or anxious\$ or worry or worries or worried or worrying or troubled or troubling or troubles or troublesome or trouble-some or frustrat\$ or stress\$ or distress\$ or embarrass\$ or empath\$ or accept\$ or alone or lonely or loneliness or fear or fears or fearing or feared or afraid or scary or scared or bother\$ or unbother\$ or pleased or displeas\$ or concern\$ or burden\$ or hassl\$ or convenien\$ or inconvenien\$ or confus\$ or hope or hopeless or hopeful or trust or trusts or mistrust\$ or distrust\$ or entrust\$ or trusting or trusted or confiden\$ or unconfiden\$)).ti.
71. ((patient\$1 or client\$1 or user\$1 or consumer\$1 or personal) adj3 (emotion\$ or feeling\$1 or happy or happiness or unhappy or unhappiness or sad or sadness or anger or angry or anxiet\$ or anxious\$ or worry or worries or worried or worrying or troubled or troubling or troubles or troublesome or trouble-some or frustrat\$ or stress\$ or distress\$ or embarrass\$ or empath\$ or accept\$ or alone or lonely or loneliness or fear or fears or fearing or feared or afraid or scary or scared or bother\$ or unbother\$ or pleased or displeas\$ or concern\$ or burden\$ or hassl\$ or convenien\$ or inconvenien\$ or confus\$ or hope or hopeless or hopeful or trust or trusts or mistrust\$ or distrust\$ or entrust\$ or trusting or trusted or confiden\$ or unconfiden\$)).ab,kf.
72. (life experience\$1 or lived experience\$1 or actual experience\$1 or real experience\$1).ti,ab,kf.
73. 53 or 54 or 55 or 56 or 57 or 58 or 59 or 60 or 61 or 62 or 63 or 64 or 65 or 66 or 67 or 68 or 69 or 70 or 71 or 72
74. 9 and 52 and 73
75. qualitativ\$.ti.
76. Qualitative Research/
77. ((patient\$1 or client\$1 or user\$1 or consumer\$1 or personal) and experiences).ti.
78. ((patient\$1 or client\$1 or user\$1 or consumer\$1 or personal) adj2 experienc\$).ti.
79. 75 or 76 or 77 or 78
80. 9 and 79
81. 74 or 80
82. exp animals/ not humans/
83. (news or comment or editorial or letter or case reports or randomized controlled trial).pt.
84. case-report.ti.
85. 81 not (82 or 83 or 84)
86. limit 81 to (english language and yr="2007 -Current")

**EMBASE (Ovid interface) EMBASE Classic + EMBASE 1947 to Week 45. Search run on 4/Nov/2017, re-run on Jan 20, 2020**

1. exp heart failure/
2. heart failure with preserved ejection fraction/
3. exp heart failure with reduced ejection fraction/
4. congestive heart failure/
5. (heart failure diastolic or heart failure systolic).mp. [mp=title, abstract, heading word, drug trade name, original title, device manufacturer, drug manufacturer, device trade name, keyword, floating subheading word]
6. ((heart\$ or cardiac or cardial or myocardial) adj3 decompensat\$).mp.
7. ((heart\$ or cardiac or cardial or myocardial) adj3 failure\$).mp.
8. ((heart\$ or cardiac or cardial or myocardial) adj3 incompetenc\$).mp.
9. ((heart\$ or cardiac or cardial or myocardial) adj3 insufficienc\$).mp.
10. ((heart\$ or cardiac or cardial or myocardial) adj3 dysfunction\$).mp.
11. (((heart\$ or cardiac or cardial or myocardial) adj3 standstill) or stand-still).mp.
12. (CHF or CHF\$ or HF or HFpEF or HFrEF).mp. [mp=title, abstract, heading word, drug trade name, original title, device manufacturer, drug manufacturer, device trade name, keyword, floating subheading word]
13. 1 or 2 or 3 or 4 or 5 or 6 or 7 or 8 or 9 or 10 or 11 or 12
14. exp qualitative research/
15. qualitativ\$.ti,ab,kw.
16. exp interview/
17. interview\$.ti,ab,kw.
18. focus group\$1.ti,ab,kw.
19. grounded theory/
20. (grounded theor\$ or grounded study or grounded studies or grounded research or grounded analys\$).ti,ab,kw.
21. phenomenology/
22. phenomenol\$.ti,ab,kw.
23. ethnography/
24. ethn nursing research/
25. (ethnograph\$ or ethn nurs\$ or ethno-graph\$ or ethno-nurs\$).ti,ab,kw.
26. verbal communication/
27. narrative/

28. storytelling/
29. (story or stories or storytelling or narrative\$1 or narration\$1).ti,ab,kw.
30. open ended questionnaire/
31. (open-ended or open question\$ or text\$).ti,ab,kw.
32. discourse analysis/
33. (discourse\$ analys\$ or discours\$ analys\$).ti,ab,kw.
34. content analysis/
35. content\$ analys\$.ti,ab,kw.
36. ethnological.ti,ab,kw.
37. purposive sample/
38. purposive sampl\$.ti,ab,kw.
39. (constant comparative or constant comparison\$1).ti,ab,kw.
40. theoretical sample/
41. theoretical sampl\$.ti,ab,kw.
42. thematic analysis/
43. (theme\$ or thematic\$).ti,ab,kw.
44. (emic or etic or hermeneutic\$ or heuristic\$ or semiotic\$).ti,ab,kw.
45. data saturat\$.ti,ab,kw.
46. observational method/
47. participant observ\$.ti,ab,kw.
48. humanism/
49. existentialism/
50. (humanistic\$ or existential\$ or experiential\$ or paradigm\$).ti,ab,kw.
51. feminism/
52. (social construct\$ or postmodern\$ or post-modern\$ or poststructural\$ or post-structural\$ or feminis\$ or constructivis\$).ti,ab,kw.
53. action research/
54. (action research or cooperative inquir\$ or co-operative inquir\$).ti,ab,kw.
55. human science.ti,ab,kw.
56. biographical method\$.ti,ab,kw.
57. life world.ti,ab,kw.
58. theoretical saturation.ti,ab,kw.
59. group discussion\$1.ti,ab,kw.
60. direct observation\$.ti,ab,kw.
61. mixed method\$.ti,ab,kw.
62. (observational method\$ or observational approach\$).ti,ab,kw.
63. key informant\$1.ti,ab,kw.
64. field study/
65. field work/
66. (field study or field studies or field research\$ or field work\$ or fieldwork\$).ti,ab,kw.
67. (semi-structured or semistructured or unstructured or un-structured or informal or in-depth or indepth).ti,ab,kw
68. "face-to-face".ti,ab,kw.
69. structured questionnaire/
70. ((guide or structured) adj5 (discussion\$1 or questionnaire\$1)).ti,ab,kw.
71. (heidegger\$ or colaizzi\$ or speigelberg\$ or van manen\$ or van kaam\$ or merleau ponty\$ or husserl\$ or giorgi\$ or foucault\$ or corbin\$ or glaser\$).ti,ab,kw.
72. 14 or 15 or 16 or 17 or 18 or 19 or 20 or 21 or 22 or 23 or 24 or 25 or 26 or 27 or 28 or 29 or 30 or 31 or 32 or 33 or 34 or 35 or 36 or 37 or 38 or 39 or 40 or 41 or 42 or 43 or 44 or 45 or 46 or 47 or 48 or 49 or 50 or 51 or 52 or 53 or 54 or 55 or 56 or 57 or 58 or 59 or 60 or 61 or 62 or 63 or 64 or 65 or 66 or 67 or 68 or 69 or 70 or 71
73. exp patient attitude/
74. attitude/
75. attitude to health/
76. attitude to illness/
77. attitude to life/
78. consumer attitude/
79. exp family attitude/
80. attitude to death/
81. satisfaction/
82. exp emotion/
83. mental stress/
84. exp patient/
85. caregiver/
86. exp psychology/
87. psychological aspect/
88. 84 or 85
89. 86 or 87
90. 88 and 89
91. doctor patient relation/
92. nurse patient relationship/
93. feedback system/

94. ((patient\$1 or client\$1 or user\$1 or consumer\$1 or personal) and (experienc\$ or perspective\$1 or perception\$1 or opinion\$1 or account or accounts or attitude\$1 or view or views or viewpoint\$1 or satisf\$ or unsatisf\$ or dissatisf\$ or disatisf\$ or belief\$1 or believ\$)).ti.
95. ((patient\$1 or client\$1 or user\$1 or consumer\$1 or personal) adj3 (experienc\$ or perspective\$1 or perception\$1 or opinion\$1 or account or accounts or attitude\$1 or view or views or viewpoint\$1 or satisf\$ or unsatisf\$ or dissatisf\$ or disatisf\$ or belief\$1 or believ\$)).ab,kw.
96. ((patient\$1 or client\$1 or user\$1 or consumer\$1 or personal) and (emotion\$ or feeling\$1 or happy or happiness or unhappy or unhappiness or sad or sadness or anger or angry or anxiet\$ or anxious\$ or worry or worries or worried or worrying or troubled or troubling or troubles or troublesome or trouble-some or frustrat\$ or stress\$ or distress\$ or embarrass\$ or empath\$ or accept\$ or alone or lonely or loneliness or fear or fears or fearing or feared or afraid or scary or scared or bother\$ or unbother\$ or pleased or displeased\$ or concern\$ or burden\$ or hassl\$ or convenien\$ or inconvenien\$ or confus\$ or hope or hopeless or hopeful or trust or trusts or mistrust\$ or distrust\$ or entrust\$ or trusting or trusted or confiden\$ or unconfiden\$)).ti.
97. ((patient\$1 or client\$1 or user\$1 or consumer\$1 or personal) adj3 (emotion\$ or feeling\$1 or happy or happiness or unhappy or unhappiness or sad or sadness or anger or angry or anxiet\$ or anxious\$ or worry or worries or worried or worrying or troubled or troubling or troubles or troublesome or trouble-some or frustrat\$ or stress\$ or distress\$ or embarrass\$ or empath\$ or accept\$ or alone or lonely or loneliness or fear or fears or fearing or feared or afraid or scary or scared or bother\$ or unbother\$ or pleased or displeased\$ or concern\$ or burden\$ or hassl\$ or convenien\$ or inconvenien\$ or confus\$ or hope or hopeless or hopeful or trust or trusts or mistrust\$ or distrust\$ or entrust\$ or trusting or trusted or confiden\$ or unconfiden\$)).ab,kw.
98. (life experience\$1 or lived experience\$1 or actual experience\$1 or real experience\$1).ti,ab,kw.
99. 73 or 74 or 75 or 76 or 77 or 78 or 79 or 80 or 81 or 82 or 83 or 90 or 91 or 92 or 93 or 94 or 95 or 96 or 97 or 98
100. 13 and 72 and 99
101. qualitativ\$.ti.
102. qualitative research/
103. ((patient\$1 or client\$1 or user\$1 or consumer\$1 or personal) and experiences).ti.
104. ((patient\$1 or client\$1 or user\$1 or consumer\$1 or personal) adj2 experienc\$).ti.
105. 101 or 102 or 103 or 104
106. 13 and 105
107. 100 or 106
108. animal/
109. animal experiment/
110. animal model/
111. animal tissue/
112. nonhuman/
113. 108 or 109 or 110 or 111 or 112
114. human/
115. 113 not 114
116. (editorial or letter or conference abstract or conference paper or conference proceeding or conference review).pt.
117. case report.ti
118. 107 not (115 or 116 or 117).
119. limit 118 to (english language and yr="2007 -Current")

### CINAHL plus Full Text (EBSCO interface). Searches run on 04/11/2017, re-tun on Jan 20, 2020.

- S1 "heart failure"
- S2 (MH "heart failure+")
- S3 (MH "cardiac output decreased+")
- S4 (MH "ventricular ejection fraction+")
- S5 (MH "cardiac patients+")
- S6 S1 OR S2 OR S3 OR S4 OR S5
- S7 (MH "Qualitative Studies+")
- S8 TI(qualitativ\*) or AB(qualitativ\*)
- S9 (MH "Interviews+")
- S10 TI(interview\*) or AB(interview\*)
- S11 (MH "Focus Groups")
- S12 TI("focus group\*") or AB("focus group\*")
- S13 TI("grounded theor\*" or "grounded study" or "grounded studies" or "grounded research" or "grounded analys\*") or AB("grounded theor\*" or "grounded study" or "grounded studies" or "grounded research" or "grounded analys\*")
- S14 (MH "Phenomenology") OR (MH "Phenomenological Research")
- S15 TI(phenomenol\*) or AB(phenomenol\*)
- S16 TI(ethnograph\* or ethnonurs\* or "ethno-graph\*" or "ethnonurs\*") or AB(ethnograph\* or ethnonurs\* or "ethno-graph\*" or "ethnonurs\*")
- S17 (MH "Storytelling+") OR (MH "Narratives")
- S18 TI(story or stories or storytelling or narrative\* or narration\*) or AB(story or stories or storytelling or narrative\* or narration\*)
- S19 (MH "Open-Ended Questionnaires")
- S20 TI("open-ended" or "open question\*" or text\*) or AB("openended" or "open question\*" or text\*)
- S21 (MH "Discourse Analysis")
- S22 TI("discourse\* analys\*" or "discurs\* analys\*") or AB("discourse\* analys\*" or "discurs\* analys\*")
- S23 (MH "Content Analysis")

- S24 TI("content\* analys\*") or AB("content\* analys\*")
- S25 TI(ethnological) or AB(ethnological)
- S26 (MH "Purposive Sample")
- S27 TI("purposive sampl\*") or AB("purposive sampl\*")
- S28 (MH "Constant Comparative Method")
- S29 TI("constant comparative" or "constant comparison\*") or AB ("constant comparative" or "constant comparison\*")
- S30 (MH "Theoretical Sample")
- S31 TI("theoretical sampl\*") or AB("theoretical sampl\*")
- S32 (MH "Thematic Analysis")
- S33 TI(theme\* or thematic\*) or AB(theme\* or thematic\*)
- S34 TI(emic or etic or hermeneutic\* or heuristic\* or semiotic\*) or AB(emic or etic or hermeneutic\* or heuristic\* or semiotic\*)
- S35 TI("data saturat\*") or AB("data saturat\*")
- S36 (MH "Observational Methods+")
- S37 TI("participant observ\*") or AB("participant observ\*")
- S38 (MH "Humanism")
- S39 TI(humanistic\* or existential\* or experiential\* or paradigm\*) or AB(humanistic\* or existential\* or experiential\* or paradigm\*)
- S40 (MH "Social Constructionism")
- S41 (MH "Postmodernism")
- S42 (MH "Feminism+")
- S43 TI("social construct\*" or postmodern\* or "post-modern\*" or poststructural\* or "post-structural\*" or feminis\* or constructivis\*) or AB("social construct\*" or postmodern\* or "post-modern\*" or poststructural\* or "post-structural\*" or feminis\* or constructivis\*)
- S44 TI("action research\*" or "cooperative inquir\*" or "co-operative inquir\*") or AB("action research\*" or "cooperative inquir\*" or "co-operative inquir\*")
- S45 TI("human science") or AB("human science")
- S46 TI("biographical method\*") or AB("biographical method\*")
- S47 TI("life world") or AB("life world")
- S48 TI("theoretical saturation") or AB("theoretical saturation")
- S49 TI("group discussion\*") or AB("group discussion\*")
- S50 TI("direct observation\*") or AB("direct observation\*")
- S51 TI("mixed method\*") or AB("mixed method\*")
- S52 TI("observational method\*" or "observational approach\*") or AB("observational method\*" or "observational approach\*")
- S53 TI("key informant\*") or AB("key informant\*")
- S54 (MH "Field Studies")
- S55 TI("field study" or "field studies" or "field research\*" or "field work\*" or fieldwork\*) or AB("field study" or "field studies" or "field research\*" or "field work\*" or fieldwork\*)
- S56 TI("semi-structured" or semistructured or unstructured or "un-structured" or informal or "in-depth" or indepth) or AB("semi-structured" or semistructured or unstructured or "un-structured" or informal or "in-depth" or indepth)
- S57 TI("face-to-face") or AB("face-to-face")
- S58 (MH "Structured Interview Guides")
- S59 (MH "Structured Questionnaires")
- S60 (MH "Discussion")
- S61 TI((guide or structured) N5 (discussion\* or questionnaire\*)) or AB((guide or structured) N5 (discussion\* or questionnaire\*))
- S62 TI(heidegger\* or colaizzi\* or speigelberg\* or "van manen\*" or "van kaam\*" or "merleau ponty\*" or husserl\* or giorgi\* or foucault\* or corbin\* or glaser\*) or AB(heidegger\* or colaizzi\* or speigelberg\* or "van manen\*" or "van kaam\*" or "merleau ponty\*" or husserl\* or giorgi\* or foucault\* or corbin\* or glaser\*)
- S63 S7 OR S8 OR S9 OR S10 OR S11 OR S12 OR S13 OR S14 OR S15 OR S16 OR S17 OR S18 OR S19 OR S20 OR S21 OR S22 OR S23 OR S24 OR S25 OR S26 OR S27 OR S28 OR S29 OR S30 OR S31 OR S32 OR S33 OR S34 OR S35 OR S36 OR S37 OR S38 OR S39 OR S40 OR S41 OR S42 OR S43 OR S44 OR S45 OR S46 OR S47 OR S48 OR S49 OR S50 OR S51 OR S52 OR S53 OR S54 OR S55 OR S56 OR S57 OR S58 OR S59 OR S60 OR S61 OR S62
- S64 (MH "Consumer Satisfaction") OR (MH "Patient Satisfaction")
- S65 (MH "Attitude") OR (MH "Attitude to Death") OR (MH "Attitude to Health") OR (MH "Attitude to Illness") OR (MH "Family Attitudes+") OR (MH "Patient Attitudes") OR (MH "Personal Satisfaction")
- S66 (MH "Patient Compliance+") OR (MH "Treatment Refusal")
- S67 (MH "Attitude to Life")
- S68 (MH "Health Beliefs")
- S69 (MH "Consumer Participation")
- S70 (MH "Emotions+")
- S71 (MH "Stress, Psychological")
- S72 (MH "Caregiver Burden")
- S73 (MH "Critical Incident Stress")
- S74 (MH "Minority Stress")
- S75 (MH "Reality Shock")
- S76 (MH "Role Stress")
- S77 (MH "Patients+/PF")
- S78 (MH "Caregivers+/PF")
- S79 (MH "Caregiver Support")
- S80 (MH "Professional-Patient Relations") OR (MH "PhysicianPatient Relations") OR (MH "Nurse-Patient Relations") OR (MH "Professional-Family Relations") OR (MH "ProfessionalClient Relations") OR (MH "Patient-Family Relations")
- S81 (MH "Empathy")
- S82 (MH "Feedback")



- S83 TI((patient\* or client\* or user\* or consumer\* or personal) and (experienc\* or perspective\* or perception\* or opinion\* or account or accounts or attitude\* or view or views or viewpoint\* or satisf\* or unsatisf\* or dissatisf\* or disatisf\* or belief\* or believ\*))
- S84 AB((patient\* or client\* or user\* or consumer\* or personal or carer\* or caregiver\* or "care-giver\*" or family\* or families) N3 (experienc\* or perspective\* or perception\* or opinion\* or account or accounts or attitude\* or view or views or viewpoint\* or satisf\* or unsatisf\* or dissatisf\* or disatisf\* or belief\* or believ\*))
- S85 TI((patient\* or client\* or user\* or consumer\* or personal) and (emotion\* or feeling\* or happy or happiness or unhappy or unhappiness or sad or sadness or anger or angry or anxiet\* or anxious\* or worry or worries or worried or worrying or troubled or troubling or troubles or troublesome or "trouble-some" or frustrat\* or stress\* or distress\* or embarrass\* or empath\* or accept\* or alone or lonely or loneliness or fear or fears or fearing or feared or afraid or scary or scared or bother\$ or unbother\$ or pleased or displeased\$ or concern\$ or burden\$ or hassl\$ or convenien\$ or inconvenien\$ or confus\$ or hope or hopeless or hopeful or trust or trusts or mistrust\$ or distrust\$ or entrust\$ or trusting or trusted or confiden\$ or unconfiden\$)).
- S86 AB((patient\* or client\* or user\* or consumer\* or personal) N3 (emotion\* or feeling\* or happy or happiness or unhappy or unhappiness or sad or sadness or anger or angry or anxiet\* or anxious\* or worry or worries or worried or worrying or troubled or troubling or troubles or troublesome or "troublesome" or frustrat\* or stress\* or distress\* or embarrass\* or empath\* or accept\* or alone or lonely or loneliness or fear or fears or fearing or feared or afraid or scary or scared or bother\$ or unbother\$ or pleased or displeased\$ or concern\$ or burden\$ or hassl\$ or convenien\$ or inconvenien\$ or confus\$ or hope or hopeless or hopeful or trust or trusts or mistrust\$ or distrust\$ or entrust\$ or trusting or trusted or confiden\$ or unconfiden\$))
- S87 (MH "Life Experiences")
- S88 TI("life experience\*" or "lived experience\*" or "actual experience\*" or "real experience\*") or AB("life experience\*" or "lived experience\*" or "actual experience\*" or "real experience\*")
- S89 S64 OR S65 OR S66 OR S67 OR S68 OR S69 OR S70 OR S71 OR S72 OR S73 OR S74 OR S75 OR S76 OR S77 OR S78 OR S79 OR S80 OR S81 OR S82 OR S83 OR S84 OR S85 OR S86 OR S87 OR S88
- S90 S6 AND S63 AND S89
- S91 TI(qualitativ\*)
- S92 (MH "Qualitative Studies")
- S93 TI((patient\* or client\* or user\* or consumer\* or personal) and experiences)
- S94 TI((patient\* or client\* or user\* or consumer\* or personal) N2 experienc\*)
- S95 S91 OR S92 OR S93 OR S94
- S96 S6 AND S95
- S97 S90 OR S96
- S98 PT (commentary or editorial or letter)
- S99 TI(case report)
- S100 S97 NOT (S98 OR S99) Limiter – Publish date: 20070101-20171131;English Language

### PsychINFO (EBSCO interface). Search run 4/Nov/2017, re-run Jan 20, 2020

- S1 DE heart
- S2 DE "heart disorders" OR DE "heart ventricles"
- S3 S1 AND S2
- S4 "heart failure"
- S5 heart N2 failure
- S6 S3 OR S4 OR S5
- S7 DE "Qualitative Research"
- S8 qualitative study
- S9 TI qualitativ\* OR AB qualitativ\*
- S10 DE "Interviews" OR DE "Intake Interview" OR DE "Interview Schedules" OR DE "Job Applicant Interviews" OR DE "Psychodiagnostic Interview"
- S11 interview
- S12 DE "Interviews" OR DE "Interviewing" OR DE "Interviewers"
- S13 TI interview\* OR AB interview\*
- S14 DE "Group Discussion"
- S15 focus group
- S16 TI focus group\* OR AB focus group
- S17 DE "Grounded Theory"
- S18 TI grounded theor\* OR TI grounded study OR TI grounded studies OR TI grounded research OR TI grounded analys\* OR AB grounded theor\* OR AB grounded study OR AB grounded studies OR AB grounded research OR AB grounded analys\*
- S19 DE "Phenomenology"
- S20 TI Phenomenol\*
- S21 AB Phenomenol\*
- S22 DE "Ethnography"
- S23 TI ethnograph\* OR TI ethnonurs\* OR TI ethno-graph\* OR TI ethno-nurs\* OR AB ethnograph\* OR AB ethnonurs\* OR AB ethno-graph\* OR TI ethno-nurs\*
- S24 DE "Storytelling"
- S25 DE "Narratives"
- S26 TI story OR TI stories OR TI storytelling OR TI narrative\*1 OR TI narration\*1
- S27 AB story OR AB stories OR AB storytelling OR AB narrative\*1 OR AB narration\*1
- S28 DE "Discourse Analysis"

- S29 TI discourse\* analys\* OR TI discours\* analys\* OR AB discourse\* analys\* OR AB discours\* analys\*
- S30 DE "Content Analysis"
- S31 TI content\* analys\* AND AB content\* analys\*
- S32 DE "Ethnology"
- S33 TI ethnological OR AB ethnological
- S34 TI purposive sampl\* OR AB purposive sampl\*
- S35 TI constant comparative OR TI constant comparison\*1 OR AB constant comparative OR AB constant comparison\*1
- S36 TI theoretical sampl\* OR AB theoretical sampl\*
- S37 TI theme\* OR TI thematic\* OR AB theme\* OR AB thematic\*
- S38 DE "Hermeneutics"
- S39 DE "Heuristics" OR DE "Heuristic Modeling"
- S40 DE "Semiotics" OR DE "Pragmatics"
- S41 TI emic OR TI etic OR TI hermenutic\* OR TI heuristic\* OR TI semiotic\* OR AB emic OR AB etic OR AB hermenutic\* OR AB heuristic\* OR AB semiotic\*
- S42 TI data saturat\* OR AB data saturat\*
- S43 DE "Observers"
- S44 TI participant observ\* OR AB participant observ\*
- S45 DE "Existentialism"
- S46 DE "Humanism"
- S47 TI humanistic\* OR TI existential\* OR TI experiential\* OR TI paradigm\* OR AB humanistic\* OR AB existential\* OR AB experiential\* OR AB paradigm\*
- S48 DE "Postmodernism"
- S49 DE "Feminism"
- S50 DE "Structuralism"
- S51 DE "Constructivism"
- S52 TI social construct\* OR TI postmodern\* OR TI post-modern\* OR TI post-modern\* OR TI post-structural\* OR TI feminis\* OR TI constructivis\* OR AB social construct\* OR AB postmodern\* OR AB post-modern\* OR AB post-structural\* OR AB feminis\*
- S53 AB constructivis\*
- S54 DE "Action Research"
- S55 TI action research OR TI cooperative inquir\* OR TI co operative inquir\* OR AB action research OR AB cooperative inquir\* OR AB co-operative inquir\*
- S56 TI human science OR AB human science
- S57 TI biographical method\* OR AB biographical method\*
- S58 TI life world OR AB life world
- S59 TI theoretical saturation OR AB theoretical saturation
- S60 TI group discussion\* OR AB group discussion\*
- S61 TI direct observation\* OR AB direct observation\*
- S62 TI mixed method\* OR AB mixed method\*
- S63 DE "Observation Methods"
- S64 TI observational method\* OR TI observational approach\* AND AB observational method\* AND AB observational approach\*
- S65 TI key informant\* OR AB key informant\*
- S66 field study
- S67 TI field study OR TI field studies OR TI field research\* OR TI field work\* OR TI fieldwork\* OR AB field study OR AB field studies OR AB field research\* OR AB field work\* OR AB fieldwork\*
- S68 TI TI semi-structured OR TI semistructured OR TI unstructured OR TI indepth OR AB semi-structured OR AB semistructured OR AB indepth OR AB in-depth OR TI un-structured OR TI informal OR TI in-depth OR TI unstructured OR AB un-structured OR AB informal
- S69 TI "face-to-face" OR AB "face-to-face"
- S70 TI ( (guide or structured) N5 (discussion\* or questionnaire\*) ) OR AB ( (guide or structured) N5 (discussion\* or questionnaire\*) )
- S71 TI ( (heidegger\* or colaizzi\* or speigelberg\* or van manen\* or van kaam\* or merleau ponty\* or husserl\* or giorgi\* or foucault\* or corbin\* or glaser\*) ) OR AB ( (heidegger\* or colaizzi\* or speigelberg\* or van manen\* or van kaam\* or merleau ponty\* or husserl\* or giorgi\* or foucault\* or corbin\* or glaser\*) )
- S72 S7 OR S8 OR S9 OR S10 OR S11 OR S12 OR S13 OR S14 OR S15 OR S16 OR S17 OR S18 OR S19 OR S20 OR S21 OR S22 OR S23 OR S24 OR S25 OR S26 OR S27 OR S28 OR S29 OR S30 OR S31 OR S32 OR S33 OR S34 OR S35 OR S36 OR S37 OR S38 OR S39 OR S40 OR S41 OR S42 OR S43 OR S44 OR S45 OR S46 OR S47 OR S48 OR S49 OR S50 OR S51 OR S52 OR S53 OR S54 OR S55 OR S56 OR S57 OR S58 OR S59 OR S60 OR S61 OR S62 OR S63 OR S64 OR S65 OR S66 OR S67 OR S68 OR S69 OR S70 OR S71
- S73 TI qualitativ\*
- S74 DE "Qualitative Research"
- S75 qualitative study
- S76 TI ( (patient\* or client\* or user\* or consumer\* or personal) ) AND TI experiences
- S77 TI ((patient\* or client\* or user\* or consumer\* or personal) N2 experienc\*)
- S78 S73 OR S74 OR S75
- S79 S76 OR S77
- S80 S6 AND S72
- S81 TI ( (rat or rats or rodent or rodents or mouse or mice or murine or hamster or hamsters or gerbil or gerbils or animal or animals or dogs or dog or canine or pig or pigs or piglet or piglets or cats or bovine or cow or cows or cattle or sheep or

ewe or ewes or horse or horses or equine or ovine or porcine or monkey or monkeys or primate or primates or rhesus macaque or rhesus macaques or rabbit or rabbits) NOT AF human\*  
 S82 (chapter or comment/reply or dissertation or editorial or letter)  
 S83 PT (book or authored book or edited book or dissertation abstract)  
 S84 (review-book or review-media or review-software & other)  
 S85 TI case report  
 S86 S06 AND S78  
 S87 S06 AND S79  
 S88 S80 OR S86 OR S87  
 S89 S81 OR S82 OR S83 OR S84 OR S85  
 S90 S88 NOT S89 Limiters – Publication Year: 2007-2017; English

## SCOPUS. Search run 4/11/2017, re-run Jan 20, 2020

( TITLE-ABS-KEY (( heart\* OR cardiac OR cardinal OR myocardia\* ) W/3 ( failure\* OR decompensat\* OR incompeten\* OR insufficienc\* OR dysfunction\* )) OR TITLE-ABS-KEY ( "heart failure" W/3 ( congestive OR diastolic OR systolic ) OR ( "preserved ejection fraction" OR "reduced ejection fraction" ) ) OR TITLE-ABS-KEY ( "CHF" OR "CHF\*s" OR "HF" OR "HFpEF" OR "HFREF" ) AND TITLE-ABS-KEY ( qualitativ\* OR interview\* OR "focus group\*" OR "grounded theor\*" OR "grounded study" OR "grounded studies" OR "grounded research" OR "grounded analys\*" OR phenomenol\* OR ethnograph\* OR ethnonurs\* OR "ethno-graph\*" OR "ethnonurs\*" OR story OR stories OR storytelling OR narrative\* OR narration\* OR "open ended" OR "open question\*" OR text\* OR "discourse\* analys\*" OR "discors\* analys\*" OR "content\* analys\*" OR ethnological OR "purposive sampl\*" OR "constant comparative" OR "constant comparison\*" OR "theoretical sampl\*" OR theme\* OR thematic\* OR emic OR etic OR hermeneutic\* OR heuristic\* OR semiotic\* OR "data saturat\*" OR "participant observ\*" OR humanistic\* OR existential\* OR experiential\* OR paradigm\* OR "social construct\*" OR postmodern\* OR "post-modern\*" OR poststructural\* OR "post-structural\*" OR feminis\* OR constructivis\* OR "action research" OR "cooperative inquir\*" OR "co-operative inquir\*" OR "human science" OR "biographical method\*" OR "life world" OR "theoretical saturation" OR "group discussion\*" OR "direct observation\*" OR "mixed method\*" OR "observational method\*" OR "observational approach\*" OR "key informant\*" OR "field study" OR "field studies" OR "field research\*" OR "field work\*" OR fieldwork\* OR "semi-structured" OR "semistructured" OR "unstructured" OR informal OR "in-depth" OR indepth OR "face-to-face" OR heidegger\* OR colaizzi\* OR speigelberg\* OR "van manen\*" OR "van kaam\*" OR "merleau ponty\*" OR husserl\* OR giorgi\* OR foucault\* OR corbin\* OR glaser\* ) OR TITLE-ABS-KEY ( guide OR structured ) W/5 ( discussion\* OR questionnaire\* ) AND TITLE ( patient\* OR client\* OR user\* OR consumer\* OR personal OR carer\* OR caregiver\* OR "care-giver\*" OR family\* OR families ) AND ( experienc\* OR perspective\* OR perception\* OR opinion\* OR account OR account s OR attitude\* OR view OR views OR viewpoint\* OR satisf\* OR unsatisf\* OR dissatisf\* OR disatisf\* OR believ\* ) OR ABS ( patient\* OR client\* OR user\* OR consumer\* OR personal OR carer\* OR caregiver\* OR "care-giver\*" OR family\* OR families ) W/3 ( experienc\* OR perspective\* OR perception\* OR opinion\* OR account OR accounts OR attitude\* OR view OR views OR viewpoint\* OR satisf\* OR unsatisf\* OR dissatisf\* OR disatisf\* OR believ\* OR believ\* ) OR KEY ( patient\* OR client\* OR user\* AND \* OR consumer\* OR personal OR carer\* OR caregiver\* OR "care-giver\*" OR family\* OR families ) W/3 ( experienc\* OR perspective\* OR perception\* OR opinion\* OR account OR accounts OR attitude\* OR view OR views OR viewpoint\* OR satisf\* OR unsatisf\* OR dissatisf\* OR disatisf\* OR believ\* OR believ\* ) OR TITLE ( patient\* OR client\* OR user\* OR consumer\* OR personal ) AND ( emotion\* OR feeling\* OR happy OR happiness OR unhappy OR unhappiness OR sad OR sadness OR anger OR angry OR anxiet\* OR anxious\* OR worry OR worries OR worried OR worrying OR troubled OR troubling OR troubles OR troublesome OR "troublesome" OR frustrat\* OR stress\* OR distress\* OR embarrass\* OR empath\* OR accept\* OR alone OR lonely OR lonelines s OR fear OR fears OR fearing OR feared OR afraid OR scary OR scared OR bother\* OR unbother\* OR pleased OR displeased\* OR concern\* OR burden\* OR hassl AND \* OR convenien\* OR inconvenien\* OR confus\* OR hope OR hopel ess OR hopeful OR trust OR trusts OR mistrust\* OR distrust\* OR entrust\* OR trusting OR trusted OR confiden\* OR unconfiden\* ) OR ABS ( patient\* OR client\* OR user\* OR consumer\* OR personal OR carer\* OR caregiver\* OR "care-giver\*" OR family\* OR families ) W/3 ( emotion\* OR feeling\* OR happy OR happiness OR unhappy OR unhappiness OR sad OR sadness OR anger OR angry OR anxiet\* OR anxious\* OR worry OR worries OR worried OR worrying OR troubled OR troubling OR troubles OR troublesome OR "troublesome" OR frustrat\* OR stress\* OR distress\* OR embarrass\* OR empath\* OR accept\* OR alone OR lonely OR lonelines s OR fear OR fears OR fearing OR feared OR afraid OR scary OR scared OR bother\* OR unbother\* OR pleased OR displeased\* OR concern\* OR burden\* OR hassl AND \* OR convenien\* OR inconvenien\* OR confus\* OR hope OR hopel ess OR hopeful OR trust OR trusts OR mistrust\* OR distrust\* OR entrust\* OR trusting OR trusted OR confiden\* OR unconfiden\* ) OR KEY ( patient\* OR client\* OR user\* OR consumer\* OR personal OR carer\* OR caregiver\* OR "care-giver\*" OR family\* OR families ) W/3 ( emotion\* OR feeling\* OR happy OR happiness OR unhappy OR unhappiness OR sad OR sadness OR anger OR angry OR anxiet\* OR anxious\* OR worry OR worries OR worried OR worrying OR troubled OR troubling OR troubles OR troublesome OR "troublesome" OR frustrat\* OR stress\* OR distress\* OR embarrass\* OR empath\* OR accept\* OR alone OR lonely OR lonelines s OR fear OR fears OR fearing OR feared OR afraid OR scary OR scared OR bother\* OR unbother\* OR pleased OR displeased\* OR concern\* OR burden\* OR hassl AND \* OR convenien\* OR inconvenien\* OR confus\* OR hope OR hopel ess OR hopeful OR trust OR trusts OR mistrust\* OR distrust\* OR entrust\* OR trusting OR trusted OR confiden\* OR unconfiden\* ) OR TITLE-ABS-KEY ( "life experience\*" OR "lived experience\*" OR "actual experience\*" OR "real experience\*" ) AND ( title- abs- KEY (( heart\* OR cardiac OR cardinal OR myocardia\* ) W/3 ( failure\* OR decompensat\* OR incompeten\* OR insuffici enc\* OR dysfunction\* )) OR TITLE-ABS-KEY ( "heart failure" W/3 ( congestive OR diastolic OR systolic ) OR ( "preserved ejection fraction" OR "reduced ejection fraction" ) ) OR TITLE-ABS-KEY ( "CHF" OR "CHF\*s" OR "HF" OR "HFpEF" OR "HFREF" ) AND TITLE ( qualitativ\* ) OR KEY ( qualitativ\* ) OR TITLE (



patient\* OR client\* OR user\* OR consumer\* OR personal ) AND {experiences} AND NOT INDEX ( medline ) AND ORIGINAL-DATE AFT 20171104

### Web of Science Core Collection: Citation Indices. Search run 4/Nov/2017, re-run Jan 20, 2020.

Indexes=SCI-EXPANDED, SSCI, A&HCI, CPCI-S, CPCI-SSH, ESCI Timespan=2007-2017

- # 1 **TOPIC:** ("heart failure")
- # 2 **TS=**((heart\* OR cardiac OR cardial OR myocardial) near/2 (failure\* OR decompensat\* OR incompetenc\* OR insufficent\* OR dysfunction\*))
- # 3 **TOPIC:** ("diastolic heart failure" OR "systolic heart failure")
- # 4 **TOPIC:** ("congestive heart failure")
- # 5 **TOPIC:** (CHF ORCHF\* OR HF OR HFpEF OR HFrEF)
- # 6 #5 OR #4 OR #3 OR #2 OR #1
- # 7 **TOPIC:** (qualitativ\*)
- # 8 **TOPIC:** (interview\*)
- # 9 **TOPIC:** ("focus group\*\*")
- # 10 **TOPIC:** ("grounded theor\*\*" OR "grounded study" OR "grounded studies" OR "grounded research" OR "grounded analys\*\*")
- # 11 **TOPIC:** (phenomenol\*)
- # 12 **TOPIC:** (ethnograph\* OR ethnonurs\* OR "ethno-graph\*\*" OR "ethno-nurs\*\*")
- # 13 **TOPIC:** (story OR stories OR storytelling OR narrative\* OR narration\*)
- # 14 **TOPIC:** ("open-ended" OR "open question\*\*" OR text\*)
- # 15 **TOPIC:** ("discourse\* analys\*\*" OR "discors\* analys\*\*")
- # 16 **TOPIC:** ("content\* analys\*\*")
- # 17 **TOPIC:** ("ethnological")
- # 18 **TOPIC:** ("purposive sampl\*\*")
- # 19 **TOPIC:** ("constant comparative" OR "constant comparison\*\*")
- # 20 **TOPIC:** ("theoretical sampl\*\*")
- # 21 **TOPIC:** (theme\* OR thematic\*)
- # 22 **TOPIC:** ("emic" OR "etic" OR hermeneutic\* OR heuristic\* OR semiotic\*)
- # 23 **TOPIC:** ("data saturat\*\*")
- # 24 **TOPIC:** ("participant observ\*\*")
- # 25 **TOPIC:** (humanistic\* OR existential\* OR experiential\* OR paradigm\*)
- # 26 **TOPIC:** ("social construct\*\*" OR postmodern\* OR "post-modern\*\*" OR poststructural\* OR "post-structural\*\*" OR feminis\* OR constructivis\*)
- # 27 **TOPIC:** ("action research" OR "cooperative inquir\*\*" OR "co-operative inquir\*\*")
- # 28 **TOPIC:** ("human science")
- # 29 **TOPIC:** ("biographical method\*\*")
- # 30 **TOPIC:** ("life world")
- # 31 **TOPIC:** ("theoretical saturation")
- # 32 **TOPIC:** ("group discussion\*\*")
- # 33 **TOPIC:** ("direct observation\*\*")
- # 34 **TOPIC:** ("mixed method\*\*")
- # 35 **TOPIC:** ("observational method\*\*" OR "observational approach\*\*")
- # 36 **TOPIC:** ("key informant\*\*")
- # 37 **TOPIC:** ("field study" OR "field studies" OR "field research\*\*" OR "field work\*\*" OR fieldwork\*)
- # 38 **TOPIC:** ("semi-structured" OR "semistructured" OR "unstructured" OR "un-structured" OR "informal" OR "indepth" OR "indepth\*\*")
- # 39 **TOPIC:** ("face-to-face")
- # 40 **TOPIC:** (("guide" OR "structured") near/5 (discussion\* OR questionnaire\*))
- # 41 **TOPIC:** (TOPIC: (heidegger\* OR colaizzi\* OR speigelberg\* OR "van manen\*\*" OR "van kaam\*\*" OR "merleau ponty\*\*" OR husserl\* OR giorgi\* OR foucault\* OR corbin\* OR glaser\*))
- # 42 #41 OR #40 OR #39 OR #38 OR #37 OR #36 OR #35 OR #34 OR #33 OR #32 OR #31 OR #30 OR #29 OR #28 OR #27 OR #26 OR #25 OR #24 OR #23 OR #22 OR #21 OR #20 OR #19 OR #18 OR #17 OR #16 OR #15 OR #14 OR #13 OR #12 OR #11 OR #10 OR #9 OR #8 OR #7
- # 43 **TOPIC:** (((patient\* OR client\* OR user\* OR consumer\* OR "personal") AND (experienc\* OR perspective\* OR perception\* OR opinion\* OR "account" OR "accounts" OR attitude\* OR "view" OR "views" OR viewpoint\* OR satisf\* OR unsatisf\* OR dissatisf\* OR disatisf\* OR belief\* OR believ\*\*)))
- # 44 **TITLE:** (((patient\* OR client\* OR user\* OR consumer\* OR "personal") AND (experienc\* OR perspective\* OR perception\* OR opinion\* OR "account" OR "accounts" OR attitude\* OR "view" OR "views" OR viewpoint\* OR satisf\* OR unsatisf\* OR dissatisf\* OR disatisf\* OR belief\* OR believ\*\*)))
- # 45 **TI=**((patient\* OR client\* OR user\* OR consumer\* OR "personal") AND (emotion\* OR feeling\* OR "happy" OR "happiness" OR "unhappy" OR "unhappiness" OR "sad" OR "sadness" OR "anger" OR "angry" OR anxiet\* OR anxious\* OR "worry" OR "worries" OR "worried" OR "worrying" OR "troubled" OR "troubling" OR "troubles" OR "troublesome" OR "troublesome" OR frustrat\* OR stress\* OR distress\* OR embarrass\* OR empath\* OR accept\* OR "alone" OR "lonely" OR "loneliness" OR "fear" OR "fears" OR "fearing" OR "feared" OR "afraid" OR "scary" OR "scared" OR bother\* OR unbother\* OR "pleased" OR "displeased" OR concern\* OR burden\* OR hassl\* OR convenien\* OR inconvenien\* OR confus\* OR "hope" OR "hopeless" OR "hopeful" OR "trust" OR "trusts" OR mistrust\* OR distrust\* OR entrust\* OR "trusting" OR "trusted" OR confiden\* OR unconfiden\*\*))
- # 46 **TS=**((patient\* OR client\* OR user\* OR consumer\* OR "personal") near/3 (emotion\* OR feeling\* OR "happy" OR "happiness" OR "unhappy" OR "unhappiness" OR "sad" OR "sadness" OR "anger" OR "angry" OR anxiet\* OR anxious\* OR "worry" OR "worries" OR "worried" OR "worrying" OR "troubled" OR "troubling" OR "troubles" OR "troublesome" OR "troublesome" OR frustrat\* OR stress\* OR distress\* OR embarrass\* OR empath\* OR accept\* OR "alone" OR "lonely" OR "loneliness" OR "fear" OR "fears" OR "fearing" OR "feared" OR "afraid" OR "scary" OR "scared" OR bother\* OR unbother\* OR "pleased" OR "displeased" OR concern\* OR burden\* OR hassl\* OR convenien\* OR inconvenien\* OR confus\* OR "hope" OR "hopeless" OR "hopeful" OR "trust" OR "trusts" OR mistrust\* OR distrust\* OR entrust\* OR "trusting" OR "trusted" OR confiden\* OR unconfiden\*\*))
- # 47 **TOPIC:** (("life experience\*\*" OR "lived experience\*\*" OR "actual experience\*\*" OR "real experience\*\*"))

#48 #47 OR #46 OR #45 OR #44 OR #43  
#49 #48 AND #42 AND #6  
#50 **TITLE:** ((qualitativ\*))  
#51 **TITLE:** (((patient\* or client\* or user\* or consumer\* or "personal") and "experiences"))  
#52 **TITLE:** (((patient\* or client\* or user\* or consumer\* or "personal") near/2 experienc\*))  
#53 #52 OR #51 OR #50  
#54 #53 AND #6  
#55 (#54 OR #49) **AND DOCUMENT TYPES:** (Article OR Abstract of Published Item OR Art Exhibit Review OR Bibliography OR Biographical-Item OR Book OR Book Chapter OR Book Review OR Chronology OR Correction OR Correction, Addition OR Dance Performance Review OR Data Paper OR Database Review OR Discussion OR Excerpt OR Fiction, Creative Prose OR Film Review OR Hardware Review OR Item About an Individual OR Meeting Summary OR Music Performance Review OR Music Score OR Music Score Review OR News Item OR Note OR Poetry OR Proceedings Paper OR Record Review OR Reprint OR Review OR Script OR Software Review OR TV Review, Radio Review OR TV Review, Radio Review Video OR Theater Review)  
#56 **TITLE:** (("case report"))  
#57 **TITLE:** (((("rat" or "rats" or "rodent" or "rodents" or "mouse" or "mice" or "murine" or "hamster" or "hamsters" or "gerbil" or "gerbils" or "animal" or "animals" or "dogs" or "dog" or "canine" or "pig" or "pigs" or "piglet" or "piglets" or "cats" or "bovine" or "cow" or "cows" or "cattle" or "sheep" or "ewe" or "ewes" or "horse" or "horses" or "equine" or "ovine" or "porcine" or "monkey" or "monkeys" or "primate" or "primates" or "rhesus macaque" or "rhesus macaques" or "rabbit" or "rabbits")))) **NOT TOPIC:** ((human\*))  
#58 #54 OR #49  
#59 (#58 NOT (#57 OR #56))  
#60 (#55 AND #59) **AND LANGUAGE:** (English)

Submitted for publication
