# Supplementary material for: Do chronic heart failure symptoms interact with burden of treatment? Qualitative literature systematic review
Source: PubMed Central journal article supplement — BMJ Open. 2021 Jul 30;11(7):e047060. doi: 10.1136/bmjopen-2020-047060 (PMC8327846; doi:10.1136/bmjopen-2020-047060), 2021-07-30
Supplement: bmjopen-2020-047060supp002.pdf [file bmjopen-2020-047060supp002.pdf]

| <b>Supplemental Material 3: A priori framework of Burden of Treatment</b> |                                     |                                                                                                                  |
|---------------------------------------------------------------------------|-------------------------------------|------------------------------------------------------------------------------------------------------------------|
| Primary construct                                                         | Secondary construct                 | Definition                                                                                                       |
| Workload                                                                  | In asking for help                  | Activate support: ask for support network to help with or take over the work                                     |
|                                                                           |                                     | Seek help: Refer for healthcare practitioners for advice or to increase level of care                            |
|                                                                           | Gaining knowledge of CHF            | Baseline knowledge: What does CHF look like and feel like                                                        |
|                                                                           |                                     | Understand what works: What to do in response to a symptom, when to seek help.                                   |
|                                                                           |                                     | Evaluate outcomes: monitor symptoms, did the treatment work                                                      |
|                                                                           | Performing tasks of CHF management  | Lifestyle changes: exercise, diet, balance lifestyle                                                             |
|                                                                           |                                     | Medication management: obtaining and filling prescriptions, taking medications, navigate healthcare system       |
|                                                                           |                                     | Specific illness task: attend regular appointments, daily weights, fluid management                              |
|                                                                           | Capacity                            | Utilize abilities                                                                                                |
| External resources                                                        |                                     | What helps the patient: financial, social support network, healthcare system, physical environment, spirituality |
| Impact                                                                    | Changes to self                     | Discontinuation of what the patient did and what was normal for them.                                            |
|                                                                           | Change to role                      | Discontinuation of the role the patient, alteration in who they believed they were                               |
|                                                                           | Negative consequences of treatments | Things that make it hard to do what healthcare providers have recommended                                        |
