# Supplementary material for: Do chronic heart failure symptoms interact with burden of treatment? Qualitative literature systematic review
Source: PubMed Central journal article supplement — BMJ Open. 2021 Jul 30;11(7):e047060. doi: 10.1136/bmjopen-2020-047060 (PMC8327846; doi:10.1136/bmjopen-2020-047060), 2021-07-30
Supplement: bmjopen-2020-047060supp003.pdf [file bmjopen-2020-047060supp003.pdf]

| Author(s)                                 | Year | Journal                          | Title (abbreviated)                                                 |
|-------------------------------------------|------|----------------------------------|---------------------------------------------------------------------|
| Ahmad et al. <sup>58</sup>                | 2016 | <i>J Card Fail</i>               | Comparing Perspectives ... Heart Failure Management                 |
| Allen et al. <sup>32</sup>                | 2009 | <i>Prog Cardiovasc Nurs</i>      | The lived experience of ... III heart failure: a pilot study        |
| Andersson et al. <sup>55</sup>            | 2012 | <i>Br J Community Nurs</i>       | Living with heart failure ... a qualitative patient study           |
| Attenburrow <sup>33</sup>                 | 2016 | <i>Br J Cardiac Nurs</i>         | Live for the day with atrial fibrillation plus heart failure        |
| Chiaranai <sup>26</sup>                   | 2014 | <i>J Cardiovas Nurs</i>          | A phenomenological study of .... of living with heart failure       |
| Cortis and Williams <sup>34</sup>         | 2007 | <i>Int Nurs Rev</i>              | Palliative and supportive needs ... adults with heart failure       |
| Falk et al. <sup>31</sup>                 | 2007 | <i>Eur J Cardiovasc Nurs</i>     | Keeping the maintenance ... in spite of chronic heart failure       |
| Fry et al. <sup>35</sup>                  | 2016 | <i>BMC Fam Pract</i>             | The implications of living with heart failure ... analysis          |
| Gallacher et al. <sup>27</sup>            | 2011 | <i>Ann Fam Med</i>               | Understanding patients' experiences ... NPT                         |
| Gowani et al. <sup>28</sup>               | 2017 | <i>Br J Cardiac Nurs</i>         | Living with heart Failure: Karachi exploratory study                |
| Gwaltney et al. <sup>59</sup>             | 2012 | <i>Br J Cardiology</i>           | Hearing ... the heart failure patient ... qualitative interviews    |
| Heo et al. <sup>36</sup>                  | 2019 | <i>Western J Nurs Res</i>        | Patients' beliefs about causes and consequences ... symptoms        |
| Holden et al. <sup>37</sup>               | 2015 | <i>Appl Ergon</i>                | The patient work system ... heart failure patients ... caregivers   |
| Hopp et al. <sup>54</sup>                 | 2012 | <i>Soc Work Health Care</i>      | Life Disruption ... American Elders With Advanced Heart Failure     |
| Kimani et al. <sup>30</sup>               | 2018 | <i>BMC Palliative Care</i>       | Multidimensional needs of patients ... serial interview study       |
| Mahoney-Davis et al. <sup>56</sup>        | 2017 | <i>Br J Cardiac Nurs</i>         | Examining the emotional and ... of people with heart failure        |
| Malhotra et al. <sup>60</sup>             | 2016 | <i>Proc Singapore Healthcare</i> | Living with heart failure ... patients from Singapore               |
| Mangoloan Shahrabaki et al. <sup>38</sup> | 2017 | <i>J Clin Nurs</i>               | The sliding context of health ... patients with heart failure ...   |
| Ming et al. <sup>39</sup>                 | 2011 | <i>J Public Health</i>           | Perspectives of heart failure patients ... from a qualitative study |
| Moshki et al. <sup>40</sup>               | 2019 | <i>OA Macedonian J Med Sci</i>   | Dark or Bright half of the moon: ...quality of life                 |
| Nordfonn et al. <sup>50</sup>             | 2019 | <i>J Clin Nurs</i>               | Patients' experience with heart failure ... burden of treatment     |
| Nordgren et al. <sup>52</sup>             | 2007 | <i>Qual Health Res</i>           | Living with ... heart failure as a middle-aged person               |
| Paton et al. <sup>41</sup>                | 2007 | <i>Can J Cardiovasc Nurs</i>     | Recalibrating time and space ... living with heart failure          |
| Pattenden et al. <sup>53</sup>            | 2007 | <i>Eur J Cardiovasc Nurs</i>     | Living with heart failure; patient and carer perspectives           |
| Paturzo et al. <sup>42</sup>              | 2016 | <i>Ann Ig</i>                    | The lived experience ... heart failure: a phenomenological study    |
| Piamjariyakul et al. <sup>43</sup>        | 2012 | <i>Appl Nurs Res</i>             | Part I: heart failure home management ... perspectives              |
| Rerkluenrit et al. <sup>49</sup>          | 2009 | <i>Thai J Nurs Res</i>           | Self-care among Thai people with heart failure                      |
| Retrum et al. <sup>44</sup>               | 2013 | <i>Circulation</i>               | Patient-identified factors related to heart failure readmissions    |
| Ryan and Farrelly <sup>45</sup>           | 2009 | <i>Eur J Cardiovasc Nurs</i>     | Living with an unfixable heart ... with advanced heart failure      |
| Sano et al. <sup>46</sup>                 | 2018 | <i>Int J Nurs Prac</i>           | Self management of congestive heart failure ... in Japan            |
| Seah et al. <sup>57</sup>                 | 2016 | <i>J Transcult Nurs</i>          | Experiences of Patients Living With Heart Failure ... Study         |
| Tenner <sup>47</sup>                      | 2018 | <i>JACC Heart Fail</i>           | Everybody has a story, and I'm lucky!                               |
| Walthall et al. <sup>29</sup>             | 2017 | <i>J Clin Nurs</i>               | Living with ... in chronic heart failure: a qualitative study       |
| Walthall et al. <sup>51</sup>             | 2019 | <i>Contemporary Nurse</i>        | Patients experience of ... advanced heart failure                   |
| Woda et al. <sup>48</sup>                 | 2015 | <i>J Community Health Nurs</i>   | Self-Care Behaviors ... Americans Living with Heart Failure         |
